# Supplementary material
Source: HighWire-hosted journal article supplement (https://innovations.bmj.com/highwire/filestream/135758/field_highwire_adjunct_files/3/bmjinnov-2014-000006supp_AppendixD.pdf)
Supplement: bmjinnov-2014-000006supp_AppendixD.pdf [file bmjinnov-2014-000006supp_AppendixD.pdf]

|                                 |                   |
|---------------------------------|-------------------|
| First Name: _____               | Gender: _____     |
| Surname: _____                  |                   |
| <b>AFFIX PATIENT LABEL HERE</b> |                   |
| Date of Birth: _____            | NHI#: _____       |
| Ward/Clinic: _____              | Consultant: _____ |

**Mental Health Services Group**

**Clozapine Initiation Checklist**

| Action                                                                                                                                                                                                                                                                                                                                          | Tick when completed |
|-------------------------------------------------------------------------------------------------------------------------------------------------------------------------------------------------------------------------------------------------------------------------------------------------------------------------------------------------|---------------------|
| Clozapine information fully discussed with consumer (and whanau/caregivers where available), including use of WDHB clozapine information resources.                                                                                                                                                                                             |                     |
| Verbal consent given or second opinion obtained and process documented in clinical notes.                                                                                                                                                                                                                                                       |                     |
| Baseline clinical assessment performed of function and symptoms.                                                                                                                                                                                                                                                                                |                     |
| Medical history reviewed (past and current comorbidity and family history of cardiovascular disease).                                                                                                                                                                                                                                           |                     |
| Physical examination performed (abdominal examination, weight, waist circumference, body mass index, pulse and blood pressure (lying and standing) and temperature).                                                                                                                                                                            |                     |
| Baseline ECG within the four weeks prior to starting clozapine.                                                                                                                                                                                                                                                                                 |                     |
| Referral made for baseline echocardiogram. N.B. test does not need to occur prior to starting clozapine. On referral form please state "pre-clozapine baseline" and give an indication of approximately when it is intended to start clozapine.                                                                                                 |                     |
| Referral made for baseline chest X-ray if none available within past five years. N.B. X-ray does not need to occur prior to starting clozapine.                                                                                                                                                                                                 |                     |
| Baseline blood tests within ten days prior to starting clozapine (FBC, electrolytes, renal and liver function tests, creatinine kinase, troponin-I, C-reactive protein, fasting blood sugar and lipid profile).                                                                                                                                 |                     |
| Consumer registered with and approved by the relevant FBC monitoring system.                                                                                                                                                                                                                                                                    |                     |
| Clozapine letter for general practitioner sent ( <a href="http://intranet/QualityDocs/Quality%20Documentation/S6%20Mental%20Health%20Services/MHSG/[1]%20Clozapine%20-%20GP%20Letter%20Mar11.pdf">http://intranet/QualityDocs/Quality%20Documentation/S6%20Mental%20Health%20Services/MHSG/[1]%20Clozapine%20-%20GP%20Letter%20Mar11.pdf</a> ). |                     |
| Clozapine wallet card given to consumer (available in all clinical areas).                                                                                                                                                                                                                                                                      |                     |

Signed: \_\_\_\_\_ Date: \_\_\_\_\_

Name (print): \_\_\_\_\_ Designation: \_\_\_\_\_

Once completed this form should be filed in the consumer's clinical notes.  
For further information see *Clozapine Best Practice Guidelines*.

**Clozapine Initiation Checklist**
